# Supplementary material for: How the AI-assisted discovery and synthesis of a ternary oxide highlights capability gaps in materials science
Source: Royal Society of Chemistry journal article supplement (doi:10.1039/d3sc04823c), 2024-01-01
Supplement: d3sc04823c1.pdf [file d3sc04823c1.pdf]

# Supplemental information to *How the AI-assisted discovery and synthesis of a ternary oxide highlights capability gaps in materials science*

Joseph Montoya<sup>‡1,\*</sup>, Carolyn Grimley<sup>‡2</sup>, Muratahan Aykol<sup>1</sup>, Colin Ophus<sup>3</sup>, Hadas Sternlicht<sup>3,4</sup>, Benjamin H. Savitzky<sup>3</sup>, Andrew M. Minor<sup>3,4</sup>, Steven Torrisi<sup>1</sup>, Jackson Goedjen<sup>5</sup>, Ching-Chang Chung<sup>2</sup>, Andrew Comstock<sup>5</sup>, Shijing Sun<sup>1</sup>

<sup>‡</sup> these authors contributed equally to this manuscript

\* [joseph.montoya@tri.global](mailto:joseph.montoya@tri.global)

<sup>1</sup>Toyota Research Institute, Energy and Materials Division, Accelerated Materials Design and Discovery

<sup>2</sup>Lucideon, Inc.

<sup>3</sup>National Center for Electron Microscopy (NCEM), Molecular Foundry, Lawrence Berkeley Lab

<sup>4</sup>Department of Materials Science and Engineering, University of California, Berkeley

<sup>5</sup>North Carolina State University, Department of Physics

## Ternary oxides reported from the ICSD over time

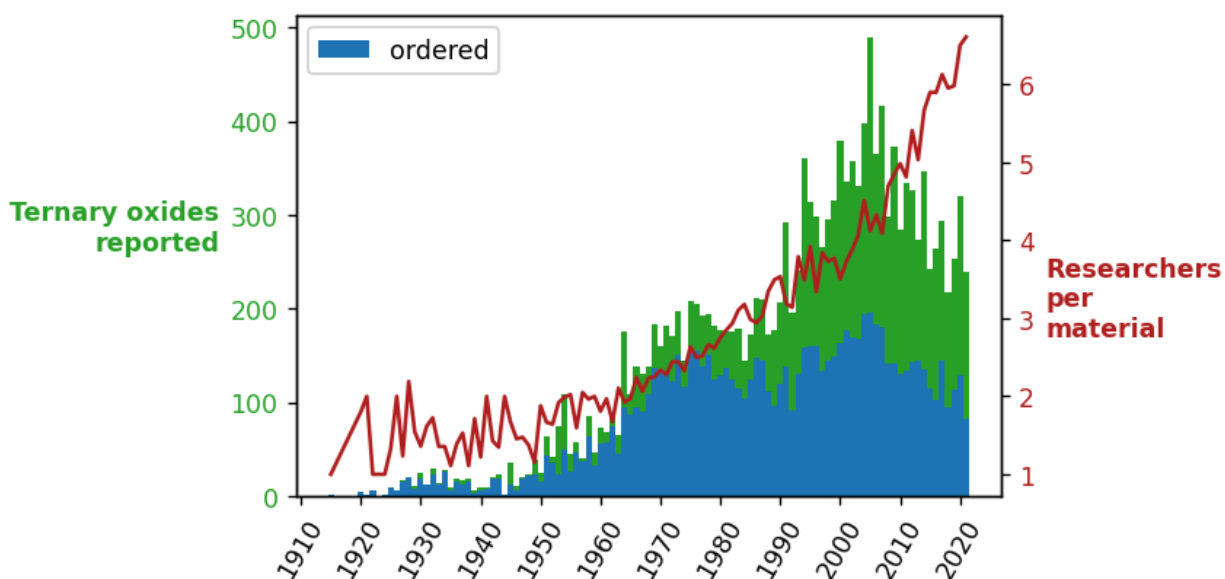

Figure S1: Ternary oxides reported in the ICSD by publication (i.e. associated citation) date. The blue region denotes ordered structures, and the green denotes disordered structures. The red line indicates the number of distinct authors in a given year divided by the number of crystal structures reported. Crystal structure data is deduplicated using pymatgen's StructureMatcher algorithm in order to ensure only distinct crystal structures are included. We note in the main text that following ~2005, the rate of discovery

of ternary oxides, both ordered (meaning no partial occupancies) and disordered (having at least one site with partial occupancies) have decreased.

## Details of synthesis down selection

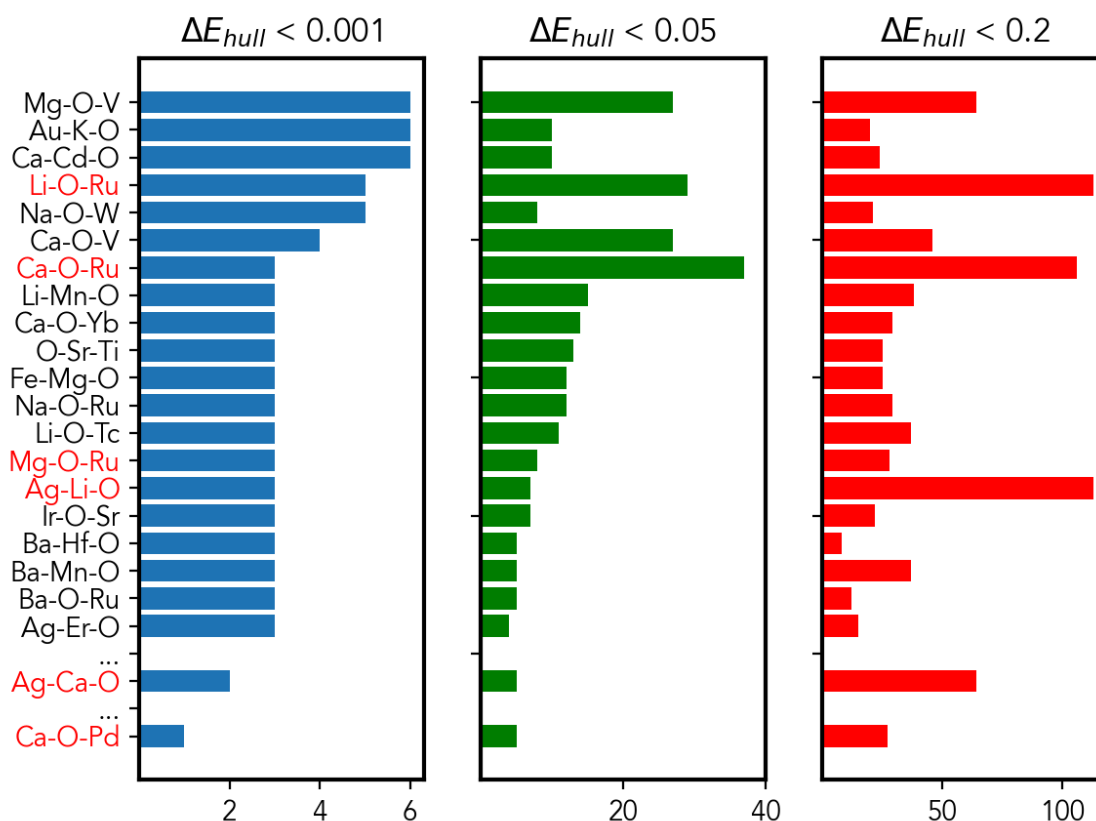

Figure S2: Selected ternary oxide chemical systems with the number of ground states ( $\Delta E_{hull} < 0.001$  eV/atom), near stable ( $\Delta E_{hull} < 0.05$  eV/atom), and metastable ( $\Delta E_{hull} < 0.2$  eV/atom), sorted by number of ground states. Chemical systems selected for synthesis in this work are shown in red text.

## Details of CAMD-predicted phases for each chemical system

Table S1 below lists all CAMD predictions in the chemical systems selected for experimental synthesis (i.e. Ag-Ca-O, Ag-Li-O, Ca-Pd-O, Ca-O-Ru, Li-O-Ru, and Mg-O-Ru) with stabilities lower than 0.05 eV/atom. The full dataset of CAMD predictions, including those from other chemical systems and those in the selected chemical systems with DFT-predicted stabilities higher than 0.05 eV/atom, can be found in the data repository associated with CAMD at [https://figshare.com/articles/dataset/camd2022\\_tar\\_gz/19601956](https://figshare.com/articles/dataset/camd2022_tar_gz/19601956).

| data_id | stability | chemsys | crystal_sys | space_group | formula |
|---------|-----------|---------|-------------|-------------|---------|
|---------|-----------|---------|-------------|-------------|---------|

|             |       |         |              |          |           |
|-------------|-------|---------|--------------|----------|-----------|
| camd_60138  | 0.000 | Ag-Ca-O | cubic        | Pm-3n    | CaAg3O4   |
| camd_40913  | 0.000 | Ag-Ca-O | cubic        | Pm-3m    | Ca3AgO4   |
| camd_45666  | 0.018 | Ag-Ca-O | orthorhombic | Pmm2     | CaAgO2    |
| camd_98118  | 0.028 | Ag-Ca-O | orthorhombic | Pmmn     | CaAg2O3   |
| camd_104952 | 0.042 | Ag-Ca-O | monoclinic   | C2/m     | Ca3Ag2O5  |
| camd_72720  | 0.000 | Ag-Li-O | cubic        | P-43n    | LiAg3O4   |
| camd_159085 | 0.000 | Ag-Li-O | tetragonal   | P4_2/mmc | LiAgO2    |
| camd_115567 | 0.000 | Ag-Li-O | tetragonal   | P4_2/mnm | Li3AgO3   |
| camd_50844  | 0.033 | Ag-Li-O | cubic        | Pm-3n    | LiAg3O4   |
| camd_61216  | 0.033 | Ag-Li-O | monoclinic   | P2_1/c   | LiAgO2    |
| camd_72984  | 0.045 | Ag-Li-O | orthorhombic | Pnnm     | Li2Ag3O4  |
| camd_47297  | 0.047 | Ag-Li-O | orthorhombic | Pmmn     | LiAg2O3   |
| camd_65605  | 0.000 | Ca-O-Pd | orthorhombic | Immm     | Ca(PdO2)3 |
| camd_39151  | 0.007 | Ca-O-Pd | orthorhombic | Pnma     | CaPdO3    |
| camd_39465  | 0.024 | Ca-O-Pd | monoclinic   | P2_1/c   | CaPdO3    |
| camd_57163  | 0.028 | Ca-O-Pd | orthorhombic | Pmc2_1   | CaPdO3    |
| camd_54742  | 0.028 | Ca-O-Pd | orthorhombic | Pnma     | CaPdO3    |
| camd_47329  | 0.000 | Ca-O-Ru | orthorhombic | Pbcn     | CaRuO4    |
| camd_47579  | 0.000 | Ca-O-Ru | hexagonal    | P6_3     | CaRuO3    |
| camd_81624  | 0.000 | Ca-O-Ru | trigonal     | R-3      | Ca3RuO6   |
| camd_71876  | 0.002 | Ca-O-Ru | monoclinic   | P2_1/c   | CaRuO3    |
| camd_46822  | 0.002 | Ca-O-Ru | triclinic    | P-1      | CaRuO3    |
| camd_45199  | 0.008 | Ca-O-Ru | orthorhombic | Pnma     | CaRuO3    |
| camd_64161  | 0.010 | Ca-O-Ru | triclinic    | P-1      | CaRuO4    |
| camd_67393  | 0.011 | Ca-O-Ru | orthorhombic | Pbam     | Ca2RuO4   |
| camd_58331  | 0.013 | Ca-O-Ru | trigonal     | P-31c    | Ca3RuO6   |
| camd_41617  | 0.013 | Ca-O-Ru | monoclinic   | P2_1/c   | Ca2RuO5   |
| camd_63861  | 0.015 | Ca-O-Ru | monoclinic   | P2_1     | Ca3RuO6   |
| camd_161552 | 0.015 | Ca-O-Ru | monoclinic   | C2/m     | Ca(RuO3)2 |
| camd_81842  | 0.015 | Ca-O-Ru | orthorhombic | Pnnm     | Ca(RuO3)2 |
| camd_75543  | 0.016 | Ca-O-Ru | tetragonal   | P4_2/mnm | Ca(RuO3)2 |
| camd_78781  | 0.018 | Ca-O-Ru | monoclinic   | C2/c     | Ca3RuO6   |
| camd_129836 | 0.019 | Ca-O-Ru | monoclinic   | C2/m     | Ca(RuO3)2 |

|             |       |         |              |                      |                                    |
|-------------|-------|---------|--------------|----------------------|------------------------------------|
| camd_80279  | 0.020 | Ca-O-Ru | orthorhombic | Cmmm                 | Ca <sub>2</sub> RuO <sub>4</sub>   |
| camd_53665  | 0.026 | Ca-O-Ru | monoclinic   | C2/c                 | CaRuO <sub>4</sub>                 |
| camd_68522  | 0.027 | Ca-O-Ru | monoclinic   | C2/m                 | Ca <sub>2</sub> RuO <sub>4</sub>   |
| camd_75504  | 0.028 | Ca-O-Ru | monoclinic   | P2/c                 | CaRuO <sub>4</sub>                 |
| camd_62825  | 0.030 | Ca-O-Ru | trigonal     | R-3c                 | Ca <sub>4</sub> RuO <sub>6</sub>   |
| camd_45861  | 0.030 | Ca-O-Ru | tetragonal   | I4 <sub>1</sub> /amd | CaRuO <sub>4</sub>                 |
| camd_75463  | 0.031 | Ca-O-Ru | orthorhombic | Imma                 | CaRuO <sub>3</sub>                 |
| camd_71570  | 0.032 | Ca-O-Ru | orthorhombic | Cmcm                 | CaRuO <sub>3</sub>                 |
| camd_42684  | 0.032 | Ca-O-Ru | orthorhombic | Pbcn                 | Ca(RuO <sub>3</sub> ) <sub>2</sub> |
| camd_50454  | 0.033 | Ca-O-Ru | trigonal     | R-3                  | CaRuO <sub>3</sub>                 |
| camd_108573 | 0.034 | Ca-O-Ru | monoclinic   | P2 <sub>1</sub> /c   | CaRuO <sub>4</sub>                 |
| camd_94472  | 0.035 | Ca-O-Ru | orthorhombic | Pccn                 | Ca <sub>2</sub> RuO <sub>4</sub>   |
| camd_54131  | 0.035 | Ca-O-Ru | orthorhombic | Pmmn                 | CaRuO <sub>3</sub>                 |
| camd_50020  | 0.036 | Ca-O-Ru | monoclinic   | P2 <sub>1</sub> /m   | CaRuO <sub>3</sub>                 |
| camd_66178  | 0.037 | Ca-O-Ru | trigonal     | R3                   | Ca <sub>3</sub> RuO <sub>6</sub>   |
| camd_56415  | 0.040 | Ca-O-Ru | tetragonal   | P4 <sub>122</sub>    | Ca <sub>2</sub> RuO <sub>4</sub>   |
| camd_68765  | 0.040 | Ca-O-Ru | orthorhombic | Cmcm                 | CaRuO <sub>4</sub>                 |
| camd_42292  | 0.040 | Ca-O-Ru | hexagonal    | P6 <sub>3</sub> /mcm | Ca(RuO <sub>3</sub> ) <sub>2</sub> |
| camd_100517 | 0.041 | Ca-O-Ru | tetragonal   | P4 <sub>322</sub>    | Ca <sub>2</sub> RuO <sub>4</sub>   |
| camd_64018  | 0.046 | Ca-O-Ru | orthorhombic | Pnna                 | CaRuO <sub>3</sub>                 |
| camd_60385  | 0.049 | Ca-O-Ru | tetragonal   | I4/mmm               | CaRuO <sub>3</sub>                 |
| camd_53058  | 0.000 | Li-O-Ru | tetragonal   | P4 <sub>322</sub>    | Li <sub>2</sub> RuO <sub>4</sub>   |
| camd_44905  | 0.000 | Li-O-Ru | monoclinic   | C2/c                 | Li <sub>4</sub> RuO <sub>5</sub>   |
| camd_45835  | 0.000 | Li-O-Ru | orthorhombic | Pccn                 | LiRuO <sub>3</sub>                 |
| camd_68313  | 0.000 | Li-O-Ru | monoclinic   | C2/c                 | Li <sub>2</sub> RuO <sub>3</sub>   |
| camd_75839  | 0.000 | Li-O-Ru | monoclinic   | C2/c                 | Li <sub>3</sub> RuO <sub>4</sub>   |
| camd_43534  | 0.004 | Li-O-Ru | orthorhombic | Fddd                 | Li <sub>2</sub> RuO <sub>3</sub>   |
| camd_62513  | 0.005 | Li-O-Ru | triclinic    | P-1                  | Li <sub>4</sub> RuO <sub>5</sub>   |
| camd_130001 | 0.006 | Li-O-Ru | monoclinic   | C2/c                 | Li <sub>2</sub> RuO <sub>3</sub>   |
| camd_169141 | 0.007 | Li-O-Ru | orthorhombic | Pnna                 | LiRuO <sub>3</sub>                 |
| camd_174041 | 0.009 | Li-O-Ru | monoclinic   | Cc                   | Li <sub>2</sub> RuO <sub>3</sub>   |
| camd_45405  | 0.010 | Li-O-Ru | monoclinic   | C2/m                 | Li <sub>5</sub> RuO <sub>5</sub>   |
| camd_64595  | 0.011 | Li-O-Ru | monoclinic   | C2/c                 | Li <sub>2</sub> RuO <sub>3</sub>   |

|             |       |         |              |          |           |
|-------------|-------|---------|--------------|----------|-----------|
| camd_171374 | 0.015 | Li-O-Ru | hexagonal    | P6_322   | LiRuO3    |
| camd_68550  | 0.016 | Li-O-Ru | orthorhombic | Pmc2_1   | LiRuO3    |
| camd_67733  | 0.016 | Li-O-Ru | trigonal     | R3c      | LiRuO3    |
| camd_69320  | 0.017 | Li-O-Ru | monoclinic   | P2_1/c   | LiRuO3    |
| camd_158919 | 0.020 | Li-O-Ru | tetragonal   | P4_122   | Li2RuO4   |
| camd_66619  | 0.020 | Li-O-Ru | orthorhombic | Cmce     | LiRuO3    |
| camd_83449  | 0.022 | Li-O-Ru | orthorhombic | Pnma     | LiRuO3    |
| camd_44914  | 0.023 | Li-O-Ru | tetragonal   | I-42d    | Li2RuO4   |
| camd_44209  | 0.024 | Li-O-Ru | orthorhombic | Pmmn     | Li2RuO3   |
| camd_66137  | 0.029 | Li-O-Ru | orthorhombic | Pbcn     | Li2RuO4   |
| camd_114454 | 0.035 | Li-O-Ru | tetragonal   | P4_2/mnm | Li3RuO4   |
| camd_85316  | 0.036 | Li-O-Ru | orthorhombic | Pmmn     | LiRuO3    |
| camd_109314 | 0.037 | Li-O-Ru | monoclinic   | C2/c     | Li2RuO4   |
| camd_71055  | 0.040 | Li-O-Ru | orthorhombic | Pmma     | LiRuO3    |
| camd_51597  | 0.042 | Li-O-Ru | cubic        | Fd-3m    | Li2RuO4   |
| camd_42856  | 0.044 | Li-O-Ru | trigonal     | R-3c     | Li2RuO3   |
| camd_77995  | 0.046 | Li-O-Ru | tetragonal   | P4_12_12 | Li2RuO4   |
| camd_40616  | 0.000 | Mg-O-Ru | triclinic    | P-1      | MgRuO4    |
| camd_53651  | 0.000 | Mg-O-Ru | tetragonal   | P4_2/mnm | Mg(RuO3)2 |
| camd_78292  | 0.000 | Mg-O-Ru | monoclinic   | P2/c     | MgRuO4    |
| camd_80073  | 0.021 | Mg-O-Ru | monoclinic   | P2_1/c   | MgRuO4    |
| camd_65316  | 0.026 | Mg-O-Ru | tetragonal   | I4_1md   | MgRuO4    |
| camd_56926  | 0.030 | Mg-O-Ru | monoclinic   | C2/c     | Mg2RuO5   |
| camd_48561  | 0.032 | Mg-O-Ru | orthorhombic | Imma     | MgRuO4    |
| camd_57618  | 0.035 | Mg-O-Ru | orthorhombic | Cmmm     | MgRuO4    |

## Details of synthesis and characterization

**In situ XRD:** An HTK-1200N heating stage was used with a PANalytical Empyrean. The milled powders were placed on platinum foil during the scans. Different scanning temperature ranges were used for each system, based on known precursor melting points, or decomposition reactions that reduce oxide into metal or generate unfavoured gas.

**Rietveld refinement:** Rietveld refinement was performed using GSAS II. The background was estimated by a sixth-order shifted Chebyshev polynomial. Other refined parameters include the

histogram scale factor, phase fractions, sample displacement, lattice constants, atomic site positions, domain size, isotropic microstrain, and instrumental SH/L terms.

**4D-STEM:** Bragg scattering was localized from 4D-STEM diffraction data using cross-correlative template matching, and the resulting signal was calibrated for origin position, ellipticity, and detector pixel size.

## Analysis of LT calcium ruthenate phase

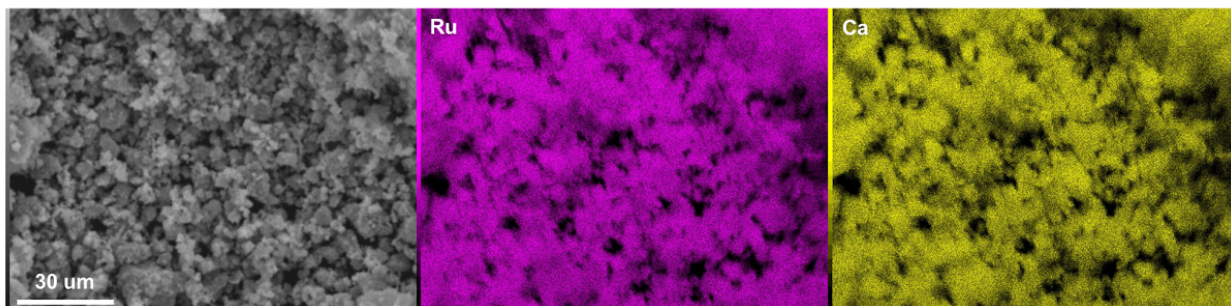

*Figure S3: EDS mapping of the isolated LT phase, corresponding to a Ca:Ru ratio of 1.8 for the bulk composition and a macroscopically uniform distribution of Ca. Further TEM characterization (Figure 7) reveals a calcium oxide secondary phase, and confirms a Ca:Ru ratio of 1.6 for the local composition of the LT phase.*

## Analysis of HT calcium ruthenate phase

In attempts to isolate the high temperature phase, heat treatments were performed first using powder with a larger particle size in order to improve the peak definition. However, the *in situ* phase was not replicated after several attempts. Subsequently, heat treatments were attempted with both the original batch of nanopowder and a new batch of nanopowder. Both of the nanopowder attempts, shown in Figure 8, reproduced the high temperature phase observed in-situ. However, room temperature XRD did not clarify the exact phase composition. Several structures in the calcium ruthenate system match some peaks, but the full peak list cannot be satisfactorily assigned using pre-existing (or predicted) phases. Detailed peak assignment can be found in Table SX. Note that the peak positions of many calcium ruthenate phases match approximately, but often with substantial deviations from both position ( $>0.5^\circ$ ) and relative intensity ( $>10\%$ ). Phase assignment is further complicated by the significant overlap of many mixed calcium ruthenate oxides and the possibility of non-equilibrium effects introduced by quenching. Expanding the search to precursors and their derivatives does not resolve the poor fit, and some peaks remain unmatched entirely. Certain features of the spectrum are highly unusual, such as the multiple double peaks around  $18$  and  $19^\circ$ ; one set of these peaks can be associated with a calcium-rich  $\text{Ca}_{2.83}\text{RuO}_{4.83}$  phase, but not both. The most likely resolution is that multiple mixed phases are present and severely distorted by the nanoscale nature of the powder, but the possibility of an unknown low symmetry phase cannot be discounted because the composition can not be satisfactorily resolved.

Characterization of this high temperature powder via EDS confirms that the quenched powder is multiphase, containing at least two phases with distinct Ca concentrations as well as small amounts of localized impurities such as Al and Na (Figure 8b and c). These impurities do not appear in sufficient quantities to explain the major unassigned peaks in the XRD patterns.

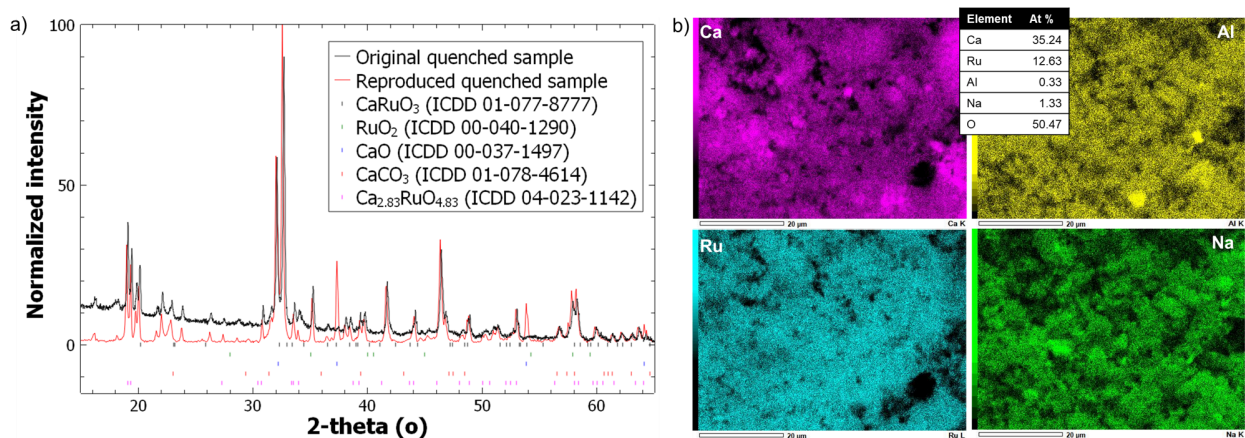

Figure S4: a) Room temperature XRD of high temperature phase obtained and reproduced by quench experiments and b) EDS mapping indicating multiphase nature with average composition reported.

Table S2: Detailed assignment of major peaks in the room temperature XRD diffraction pattern of the high temperature (HT) Ca-Ru-O phase.

| Pos. [ $2\theta$ ] | d-spacing [Å] | Rel. Int. [%] | PDF match        | peak | PDF intensity | Matched by                                                                                                 |
|--------------------|---------------|---------------|------------------|------|---------------|------------------------------------------------------------------------------------------------------------|
| 16.1255            | 5.49204       | 2.14          |                  |      |               |                                                                                                            |
| 18.157             | 4.88188       | 1.54          |                  |      |               | 04-011-8727                                                                                                |
| 18.9856            | 4.67065       | 29.8          | 18.947           |      | 47.9          | 01-073-8394 (Ca(OH)2)<br>Requires 100 peak at 36.487                                                       |
| 19.3312            | 4.58792       | 21.43         | 19.340           |      | 100           | 04-023-1142 (Ca <sub>2.83</sub> RuO <sub>4</sub> )<br>Requires an additional 92.4 intensity peak at 19.095 |
| 19.7655            | 4.48808       | 7.84          |                  |      |               | 04-014-5351                                                                                                |
| 20.0231            | 4.4309        | 15.09         | 19.999<br>20.140 |      | 0.1<br>46.6   | 04-014-5351 (CaRuO <sub>3</sub> )<br>04-014-7728 (Ca(OH)2)                                                 |

| Pos. [°2θ] | d-spacing [Å] | Rel. Int. [%] | PDF match                            | peak                       | PDF intensity | Matched by                                                                                                                                                                                                                                                                                          |
|------------|---------------|---------------|--------------------------------------|----------------------------|---------------|-----------------------------------------------------------------------------------------------------------------------------------------------------------------------------------------------------------------------------------------------------------------------------------------------------|
|            |               |               |                                      |                            |               | requires 100 peak at 36.36                                                                                                                                                                                                                                                                          |
| 21.5861    | 4.11347       | 2.24          |                                      |                            |               | 04-011-8727                                                                                                                                                                                                                                                                                         |
| 22.0397    | 4.02984       | 7.7           |                                      |                            |               | 04-012-6012                                                                                                                                                                                                                                                                                         |
| 22.7128    | 3.91191       | 3.55          |                                      |                            |               | 04-014-5351                                                                                                                                                                                                                                                                                         |
| 22.8538    | 3.8881        | 3.53          |                                      |                            |               | 04-014-5351                                                                                                                                                                                                                                                                                         |
| 23.7696    | 3.74032       | 3.97          |                                      |                            |               |                                                                                                                                                                                                                                                                                                     |
| 26.2427    | 3.39317       | 2.84          |                                      |                            |               |                                                                                                                                                                                                                                                                                                     |
| 27.3775    | 3.25505       | 2.01          |                                      |                            |               | 04-023-1142,<br>04-011-8727,<br>04-012-6012                                                                                                                                                                                                                                                         |
| 28.6379    | 3.11459       | 1.26          |                                      |                            |               |                                                                                                                                                                                                                                                                                                     |
| 29.5954    | 3.01596       | 0.9           |                                      |                            |               | 04-012-6012                                                                                                                                                                                                                                                                                         |
| 30.7906    | 2.90157       | 6.85          |                                      |                            |               | 04-023-1142,<br>01-073-8394                                                                                                                                                                                                                                                                         |
| 32.0126    | 2.79354       | 50.73         | 32.347<br>32.311<br>31.874<br>32.304 | 26.6<br>41.1<br>100<br>100 |               | 04-014-5351 (CaRuO <sub>3</sub> ,<br>added manually)<br>04-005-4398 (CaO,<br>requires 100 peak at<br>37.481)<br>04-014-3870 (RuO <sub>2</sub> ,<br>requires a 47 peak at<br>36.970)<br>04-012-6012<br>(Ca <sub>2</sub> RuO <sub>4</sub> , requires<br>45.6 peak at 24.259<br>where there isn't one) |
| 32.5836    | 2.74587       | 100           | 32.731<br>32.569<br>32.591           | 100<br>100<br>38.6         |               | 04-014-5351 (CaRuO <sub>3</sub> )<br>04-011-8727<br>(Ca <sub>3</sub> Ru <sub>2</sub> O <sub>7</sub> , requires a                                                                                                                                                                                    |



| Pos. [°2θ] | d-spacing [Å] | Rel. Int. [%] | PDF match                  | peak | PDF intensity     | Matched by                                                                                                                                                                                                                                                                                                  |
|------------|---------------|---------------|----------------------------|------|-------------------|-------------------------------------------------------------------------------------------------------------------------------------------------------------------------------------------------------------------------------------------------------------------------------------------------------------|
|            |               |               |                            |      |                   | 34.6 peak at 32.395)<br>04-012-6012<br>(Ca <sub>2</sub> RuO <sub>4</sub> , requires a 100 peak at 32.304)                                                                                                                                                                                                   |
| 33.5375    | 2.66992       | 6.25          | 33.03                      |      | 25.0              | 04-014-5351 (CaRuO <sub>3</sub> , added manually)<br>04-023-1142,<br>04-011-8727                                                                                                                                                                                                                            |
| 33.9398    | 2.63919       | 3.44          |                            |      |                   | 04-023-1142,<br>04-011-8727,<br>04-012-6012                                                                                                                                                                                                                                                                 |
| 35.144     | 2.55147       | 13.7          |                            |      |                   | Unmatched                                                                                                                                                                                                                                                                                                   |
| 36.4566    | 2.46256       | 1.4           | 36.487                     |      | 100               | 01-073-8394 (Ca(OH) <sub>2</sub> )<br>04-014-5351,<br>04-012-6012,<br>04-014-7728,                                                                                                                                                                                                                          |
| 37.3363    | 2.40653       | 27.27         | 37.481<br>37.356<br>37.477 |      | 100<br>2.0<br>1.1 | 04-005-4398 (CaO, requires a 50.9 peak at 54.048)<br>04-011-8727<br>(Ca <sub>3</sub> Ru <sub>2</sub> O <sub>7</sub> , requires an identical 2 peak at 38.149 and a 30.8 peak at 18.101)<br>04-012-6012<br>(Ca <sub>2</sub> RuO <sub>4</sub> , requires two additional 1 and 0.4 peaks at 37.049 and 37.832) |
| 38.0115    | 2.36533       | 5.25          | 38.088                     |      | 1.6               | 04-012-6012<br>(Ca <sub>2</sub> RuO <sub>4</sub> , see above for additional requirements)                                                                                                                                                                                                                   |
| 38.424     | 2.34088       | 3.96          |                            |      |                   | 04-014-5351,                                                                                                                                                                                                                                                                                                |

| Pos. [°2θ] | d-spacing [Å] | Rel. Int. [%] | PDF match        | peak | PDF intensity | Matched by                                                                                                                                                                                                 |
|------------|---------------|---------------|------------------|------|---------------|------------------------------------------------------------------------------------------------------------------------------------------------------------------------------------------------------------|
|            |               |               |                  |      |               | 04-011-8727,<br>01-073-8394                                                                                                                                                                                |
| 39.2936    | 2.29105       | 6.93          |                  |      |               | 04-023-1142,<br>04-011-8727                                                                                                                                                                                |
| 39.65      | 2.27128       | 6.3           |                  |      |               | 04-012-6012                                                                                                                                                                                                |
| 41.6205    | 2.16818       | 19.94         | 41.523<br>41.626 |      | 4.4<br>0.5    | 04-014-3870 (RuO <sub>2</sub> ,<br>requires 100 peak at<br>31.874 and a 47.0 peak<br>at 36.970)<br>04-011-8727<br>(Ca <sub>3</sub> Ru <sub>2</sub> O <sub>7</sub> , see above<br>for requirements)         |
| 44.0342    | 2.05477       | 6.88          |                  |      |               | 04-023-1142                                                                                                                                                                                                |
| 44.6185    | 2.02921       | 0.65          |                  |      |               | 04-012-6012                                                                                                                                                                                                |
| 45.2421    | 2.00268       | 1.25          |                  |      |               | 04-012-6012                                                                                                                                                                                                |
| 46.3277    | 1.95825       | 29.78         | 46.035<br>46.315 |      | 26.9<br>16.2  | 04-023-1142<br>(Ca <sub>2.83</sub> RuO <sub>4.83</sub> , see<br>above for additional<br>requirements)<br>04-011-8727<br>(Ca <sub>3</sub> Ru <sub>2</sub> O <sub>7</sub> , requires<br>28.8 peak at 47.136) |
| 46.7552    | 1.94133       | 6.61          |                  |      |               | 04-014-5351,<br>04-011-8727                                                                                                                                                                                |
| 48.2326    | 1.88526       | 1.78          |                  |      |               | 04-014-5351,<br>04-023-1142,<br>04-011-8727,<br>04-012-6012                                                                                                                                                |
| 48.7665    | 1.86586       | 7.15          |                  |      |               |                                                                                                                                                                                                            |
| 50.1654    | 1.81706       | 1.67          |                  |      |               | 04-023-1142,<br>01-073-8394                                                                                                                                                                                |

| Pos. [°2θ] | d-spacing [Å] | Rel. Int. [%] | PDF match                                              | peak                                   | PDF intensity | Matched by                                                                                                                                                                                                                                                                                                                                                       |
|------------|---------------|---------------|--------------------------------------------------------|----------------------------------------|---------------|------------------------------------------------------------------------------------------------------------------------------------------------------------------------------------------------------------------------------------------------------------------------------------------------------------------------------------------------------------------|
| 50.9441    | 1.7911        | 3.3           |                                                        |                                        |               | 04-023-1142,<br>04-011-8727                                                                                                                                                                                                                                                                                                                                      |
| 51.2901    | 1.77983       | 4.47          |                                                        |                                        |               | 04-014-5351                                                                                                                                                                                                                                                                                                                                                      |
| 52.6177    | 1.738         | 2.78          |                                                        |                                        |               | 04-014-5351,<br>04-023-1142,<br>04-012-6012                                                                                                                                                                                                                                                                                                                      |
| 52.9722    | 1.7272        | 12.43         | 53.177.<br>52.974<br>52.921/52.719<br>52.754<br>53.177 | 23.4<br>15.4<br>0.5/6.8<br>0.4<br>23.4 |               | 04-014-5351 (Ca(OH) <sub>2</sub> ,<br>requires 100 peak at<br>36.360)<br>04-023-1142<br>(Ca <sub>2.83</sub> RuO <sub>4.83</sub> ,<br>requires 15.1 peak at<br>52.467 and 13.0 peak<br>at 52.059)<br>04-011-8727<br>(Ca <sub>3</sub> Ru <sub>2</sub> O <sub>7</sub> )<br>04-012-6012<br>(Ca <sub>2</sub> RuO <sub>4</sub> )<br>04-014-7728 (Ca(OH) <sub>2</sub> ) |
| 53.8488    | 1.70114       | 13.94         | 54.048<br>53.804<br>53.931<br>53.361                   | 50.9<br>1.5<br>3.4<br>8.4              |               | 04-005-4398 (CaO)<br>04-014-5351 (CaRuO <sub>3</sub> )<br>04-011-8727<br>(Ca <sub>3</sub> Ru <sub>2</sub> O <sub>7</sub> )<br>04-012-6012<br>(Ca <sub>2</sub> RuO <sub>4</sub> )                                                                                                                                                                                 |
| 56.6635    | 1.62313       | 4.08          |                                                        |                                        |               | 04-023-1142                                                                                                                                                                                                                                                                                                                                                      |
| 57.5089    | 1.60126       | 4.77          |                                                        |                                        |               | 04-014-7728                                                                                                                                                                                                                                                                                                                                                      |
| 57.8141    | 1.59353       | 16.77         | 57.936<br>57.894<br>57.974/57.428/<br>57.083           | 14.6<br>13.4<br>13.5/11.7/11.<br>3     |               | 04-014-5351 (CaRuO <sub>3</sub> )<br>04-011-8727<br>(Ca <sub>3</sub> Ru <sub>2</sub> O <sub>7</sub> )<br>04-012-6012<br>(Ca <sub>2</sub> RuO <sub>4</sub> )                                                                                                                                                                                                      |
| 58.1831    | 1.58431       | 17.83         | 58.052<br>58.225                                       | 4.8<br>13.4                            |               | 04-023-1142<br>(Ca <sub>2.83</sub> RuO <sub>4.83</sub> )                                                                                                                                                                                                                                                                                                         |

| Pos. [°2θ] | d-spacing [Å] | Rel. Int. [%] | PDF match | peak | PDF intensity | Matched by                                                                  |
|------------|---------------|---------------|-----------|------|---------------|-----------------------------------------------------------------------------|
|            |               |               |           |      |               | 04-011-8727<br>(Ca <sub>3</sub> Ru <sub>2</sub> O <sub>7</sub> )            |
| 59.8755    | 1.5435        | 3.73          |           |      |               | 04-023-1142,<br>04-012-6012                                                 |
| 60.2847    | 1.534         | 1.92          |           |      |               | 04-023-1142                                                                 |
| 61.3072    | 1.51085       | 2.91          |           |      |               | 04-014-5351,<br>04-011-8727                                                 |
| 62.1079    | 1.49328       | 3.24          |           |      |               | 04-014-7728                                                                 |
| 62.9749    | 1.47479       | 2.44          |           |      |               | 04-011-8727,<br>04-012-6012                                                 |
| 63.6116    | 1.46155       | 5.68          |           |      |               | 04-014-3870,<br>04-023-1142,<br>04-011-8727,<br>04-012-6012                 |
| 64.1654    | 1.45027       | 5.68          |           |      |               | 04-005-4398,<br>04-014-5351,<br>04-023-1142,<br>04-011-8727,<br>04-012-6012 |

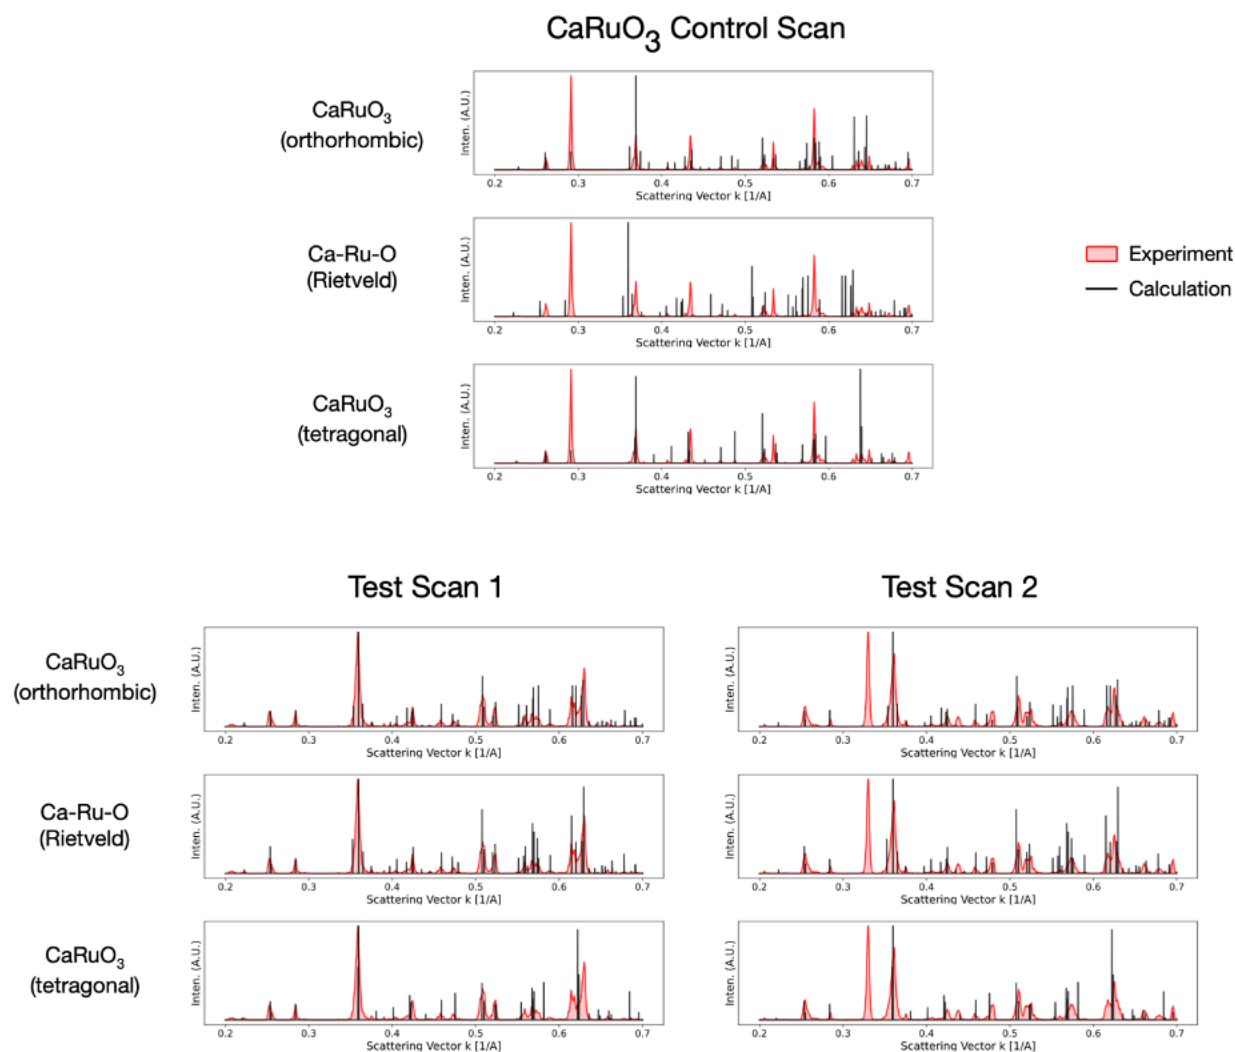

Figure S5: Bragg scattering profiles isolated from 4D-STEM scans of the standard sample and two scans of the LT phase (test scans), compared to computed scattering for standard orthorhombic CaRuO<sub>3</sub>, to the Rietveld refined Ca-Ru-O structure, and to a simplified CaRuO<sub>3</sub> structure in which the *a* and *c* lattice parameters have been replaced by their mean, resulting in a tetragonal structure. The standard sample is compared to an unmodified standard CaRuO<sub>3</sub> structure, while the scans of the LT phase are compared to CaRuO<sub>3</sub> with its cell expanded isotropically by 2.55%.

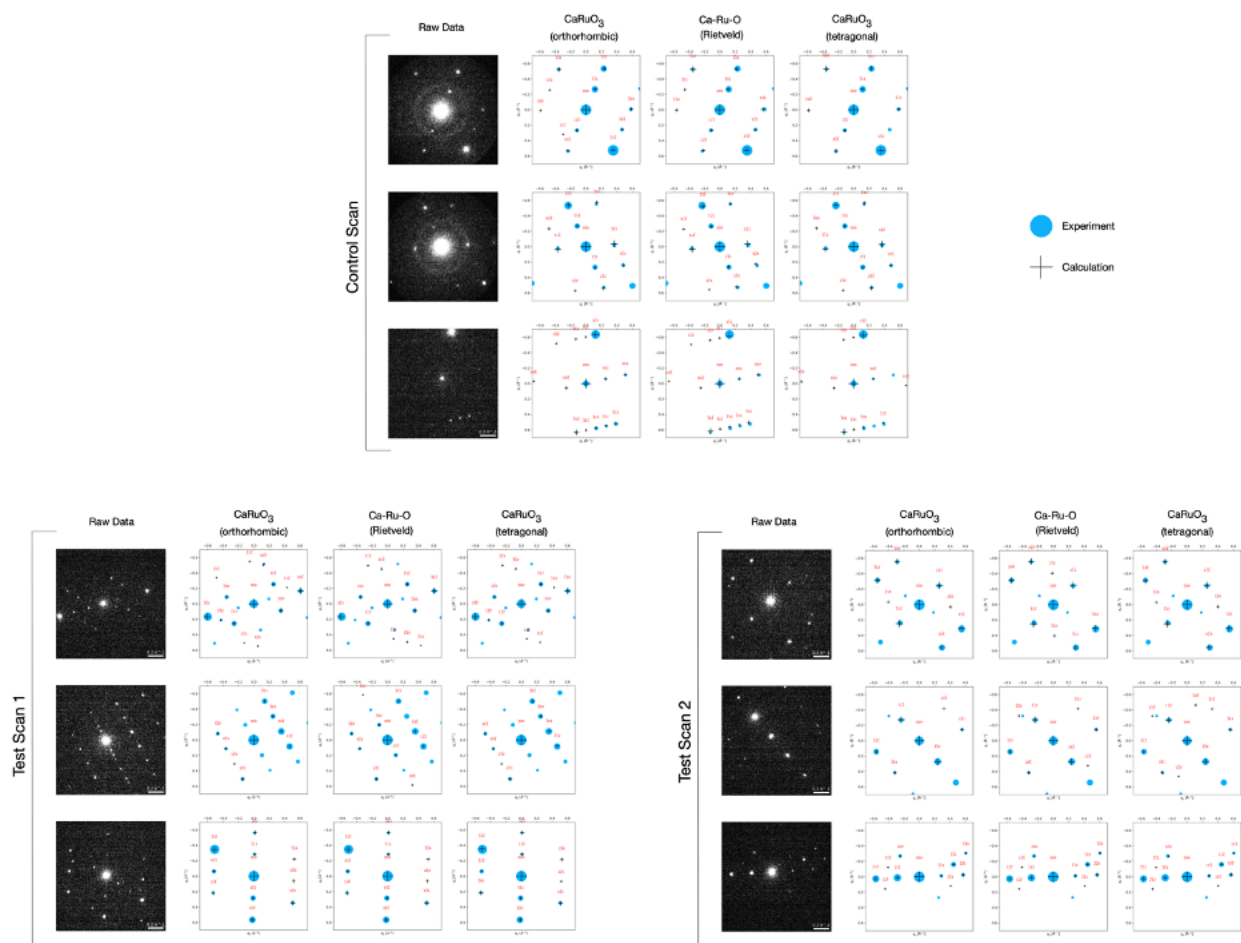

Figure S6: Two-dimensional pattern matching between standard orthorhombic  $\text{CaRuO}_3$ , simplified tetragonal  $\text{CaRuO}_3$ , and the Rietveld refined LT phase structure versus Bragg signal isolated from 4D-STEM scans of the standard sample and two scans of the LT phase (test scans). The  $\text{CaRuO}_3$  structure was expanded isotropically by 2.55% in the matches to the datasets of the LT phase, and is unmodified in the matches to the standard dataset. The structures are quite similar, leading to similar matches to the data.

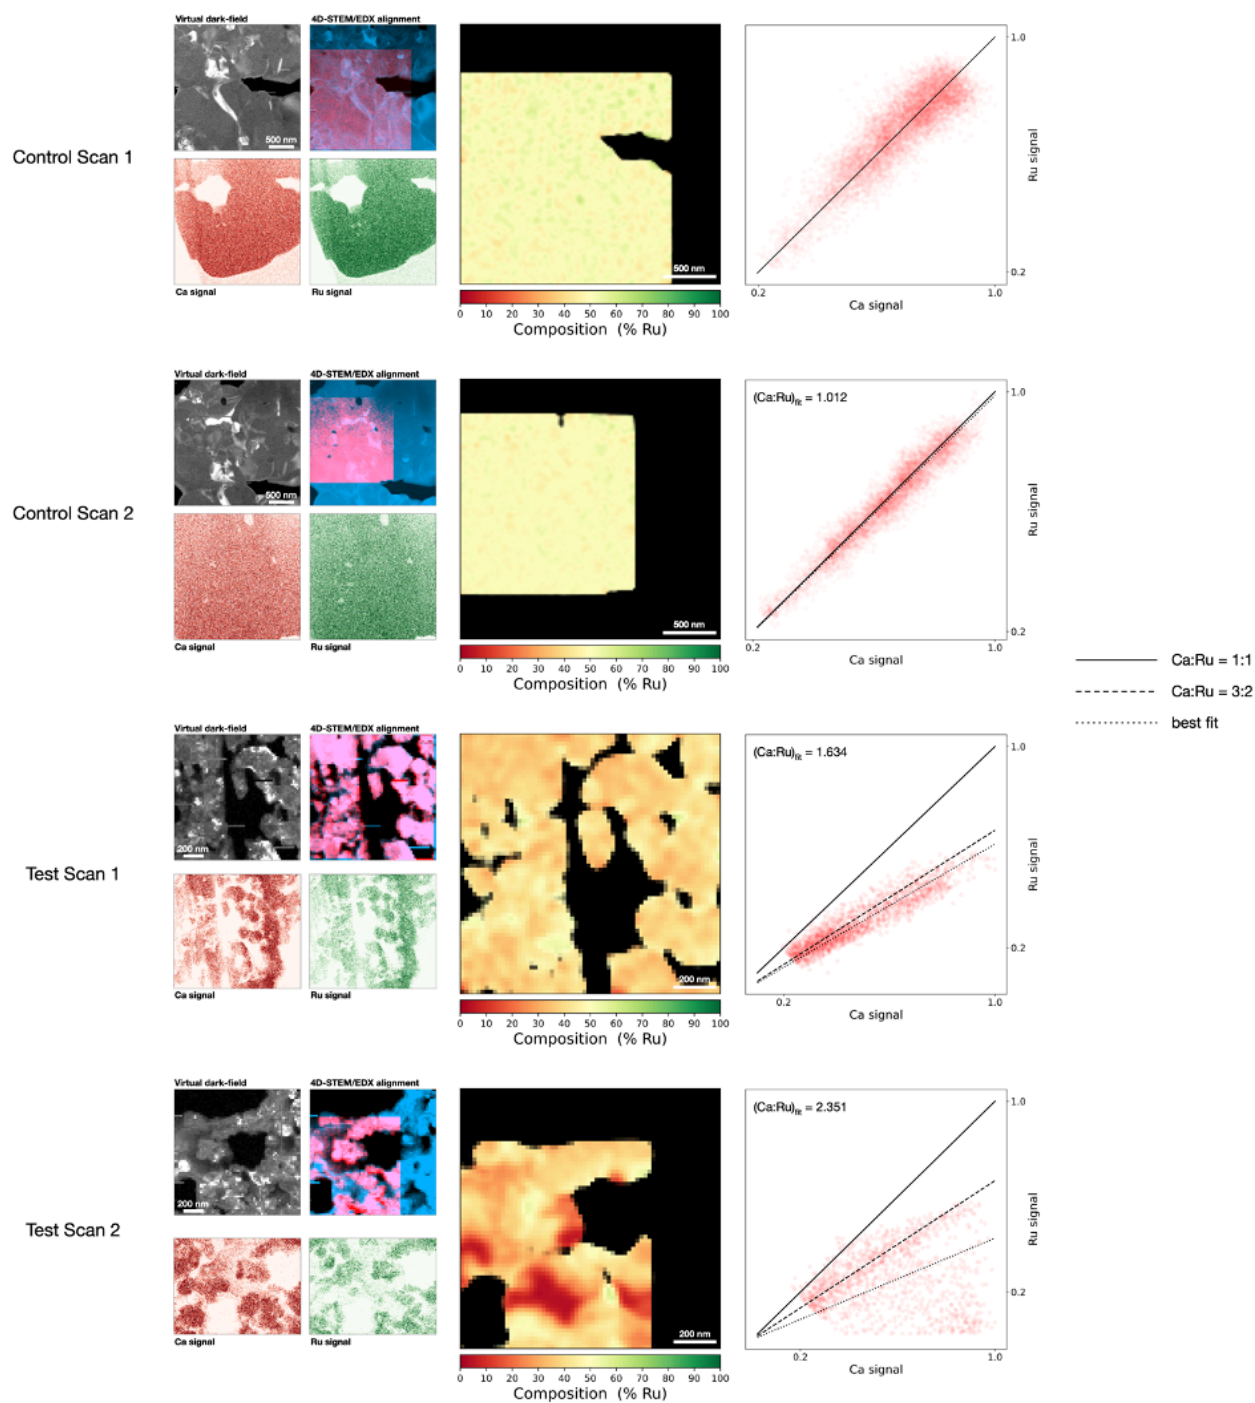

Figure S7: Alignment of EDX- and 4D-STEM for two standard scans and two scans of the LT phase. We solved for the affine transformation which best aligns the combined EDX signal to a contrast inverted virtual bright-field signal. The alignment images show the bright-field in the blue channel and the transformed EDX signal in the red channel. The scaling ratio ( $k$ -factor) between the Ca and Ru signals was extracted using the first standard scan and assuming a Ca:Ru atomic ratio of 1:1. The best fit line to the composition scatter plot from the second standard scan yields a Ca:Ru ratio of 1.012.

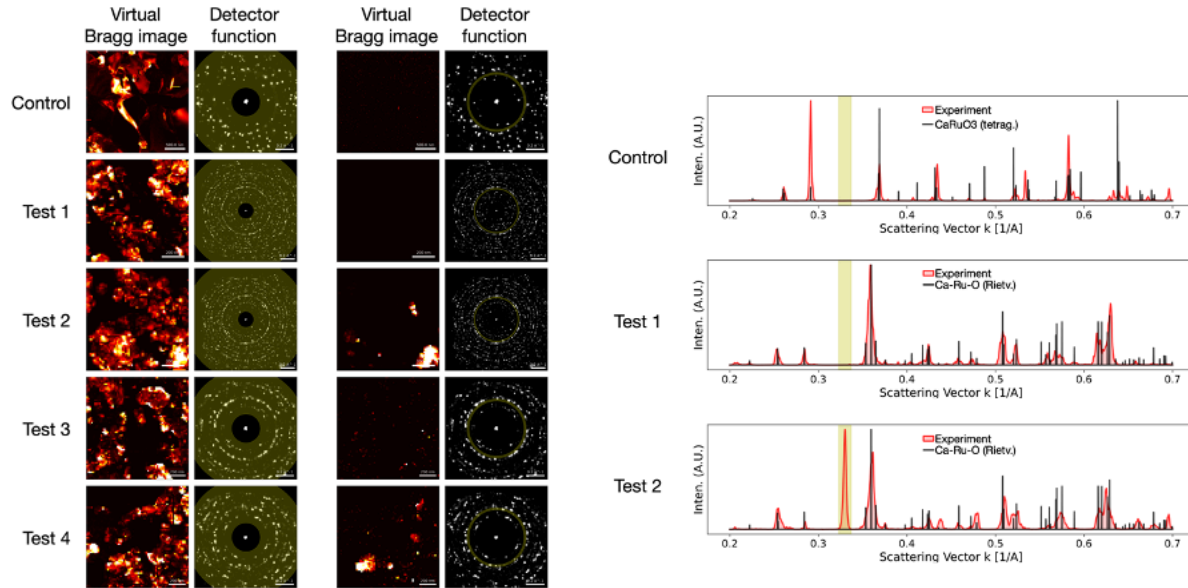

Figure S8: Virtual Bragg images of all high-angle Bragg scattering and of the Bragg scattering in the window  $0.330 \pm 0.007 \text{ \AA}^{-1}$  spanning a calcium oxide peak. The signal used to compute these images is the localized Bragg scattering signal, with positions and intensities determined by cross correlating the STEM vacuum probe with each diffraction pattern to localize Bragg reflections of the probe. The detector functions shown in yellow indicate the regions of diffraction space Bragg signal must fall within to be summed when computing the corresponding images. The narrow detector function is also shown overlaid with 1D scattering profiles for several scans, with the oxide peak clearly visible in the profile for test scan 2 of the LT phase. No calcium oxide peak was found in any of the standard scans. The peak was present in some but not all of the test scans of the LT phase, with maps of the calcium oxide grains visible in the corresponding virtual Bragg images.

## Details of SQUID measurements

Magnetization was measured down to 5K using a superconducting quantum interference device (Quantum Design SQUID VSM magnetometer). The measurements were taken via SQUID against both temperature and magnetic field. For the field-cooled (FC) measurements, the sample was cooled to 5K under an applied 3 kOe field; then the field was removed and the sample was warmed to room temperature under a 100G field while magnetization was measured. For zero field-cooled (ZFC) measurements, the same procedure was repeated, except no field was applied during the cooling step. Magnetization as a function of applied field was measured by cooling with (ZFC) or without (FC) applied field to 5K, removing the applied field, then applying the maximum field and cycling down and back up, collecting magnetization data.



## Additional XRD patterns

$\Delta$   $\text{CaCO}_3$   $\circ$   $\text{RuO}_2$   $*$   $\text{CaRuO}_3$   $\dagger$   $\text{CaO}$   $\times$  Low-temperature (Ru-poor) phase  
 $?$  Unknown high-temperature phase

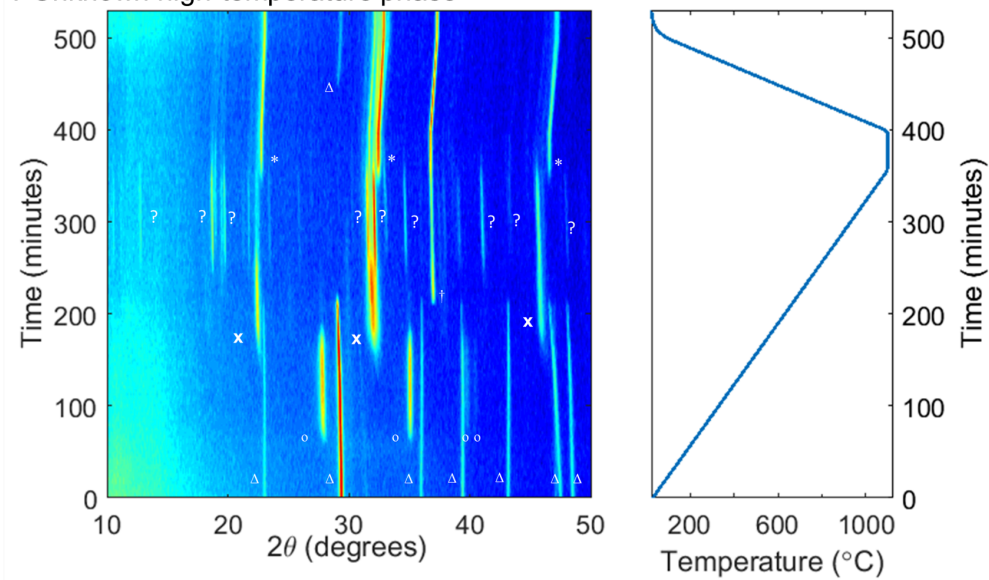

Figure S9: provides the annealing and cooling data which demonstrate the collapse of the metastable phase into  $\text{CaRuO}_3$  and excess  $\text{CaO}$ .

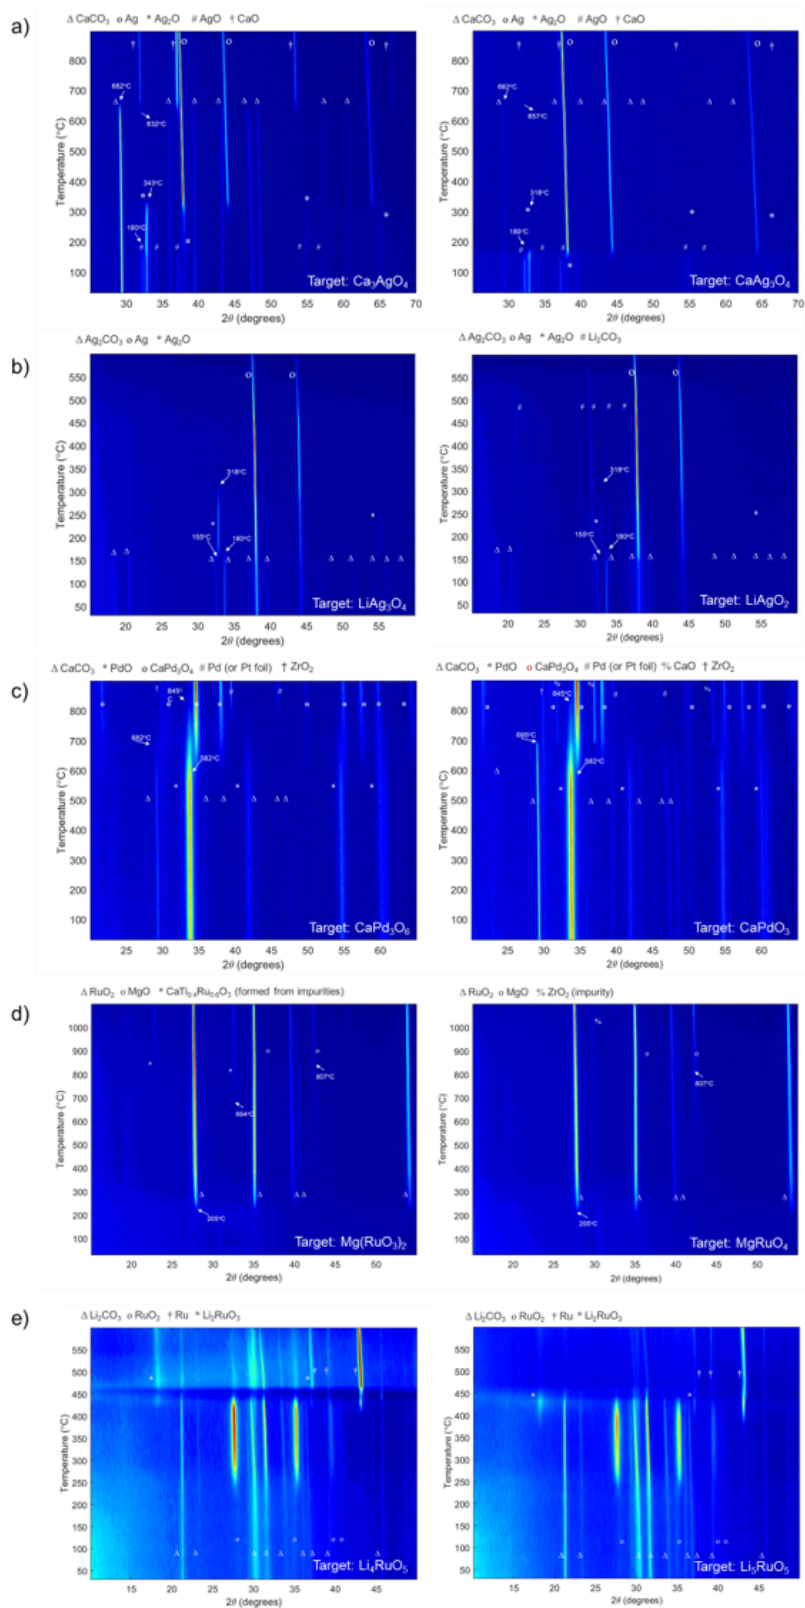

Figure S10: In-situ XRD results for a) Ca-Ag-O, b) Li-Ag-O, c) Ca-Pd-O, d) Mg-Ru-O, e) Li-Ru-O.
